# Supplementary material
Source: ML conference proceedings conference paper supplement (https://openreview.net/forum?id=3S9Oiu6gMf)
Supplement: supplementary_material [file attachment]

---

# Learning bounded degree polytrees with samples

---

Anonymous Author(s)

Affiliation

Address

email

## Abstract

We establish finite-sample guarantees for efficient proper learning of bounded-degree *polytrees*, a rich class of high-dimensional probability distributions and a subclass of Bayesian networks, a widely-studied type of graphical models. Very recently, [Bhattacharyya et al. \[2021\]](#) obtained finite-sample guarantees for recovering tree-structured Bayesian networks, i.e., 1-polytrees. We considerably extend their results by providing an efficient algorithm which learns  $d$ -polytrees in polynomial time and sample complexity when the in-degree  $d$  is constant, provided that the underlying undirected graph (skeleton) is known. We complement our algorithm with an information-theoretic lower bound, showing that the dependence of our sample complexity is nearly tight in both the dimension and target accuracy parameters.

## 1 Introduction

Distribution learning, or density estimation, is the task of obtaining a good estimate of some unknown underlying probability distribution  $P$  from observational samples. Understanding which classes of distributions could be or could not be learnt efficiently is a fundamental problem in both computer science and statistics, where efficiency is measured in terms of *sample* (data) and *computational* (time) complexities.

*Bayesian networks* (or *Bayes nets* in short) represent a class of high-dimensional distributions that can be explicitly described by how each variable is generated sequentially in a directed fashion. Being interpretable, Bayes nets have been used to model beliefs in a wide variety of domains (e.g. see [\[Jensen and Nielsen, 2007, Koller and Friedman, 2009\]](#) and references therein). A fundamental problem in computational learning theory is to identify families of Bayes nets which can be learned efficiently from observational data.

Formally, a Bayes net is a probability distribution  $P$ , defined over some directed acyclic graphs (DAG)  $G = (V, E)$  on  $|V| = n$  nodes that factorizes according to  $G$  (i.e. Markov with respect to  $G$ ) in the following sense:  $P(v_1, \dots, v_n) = \prod_{v_1, \dots, v_n} P(v \mid \pi(v))$ , where  $\pi(v) \subseteq V$  are the parents of  $v$  in  $G$ . While it is well-known that given the DAG (structure) of a Bayes net, there exists sample-efficient algorithms that output good hypotheses [\[Dasgupta, 1997, Bhattacharyya et al., 2020\]](#), there is no known computationally efficient algorithms for obtaining the DAG of a Bayes net. In fact, it has long been understood that Bayes net structure learning is computationally expensive, in various general settings [\[Chickering et al., 2004\]](#). However, these hardness results fall short when the goal is learning the distribution  $P$  in the probabilistically approximately correct (PAC) [\[Valiant, 1984\]](#) sense (with respect to, say, KL divergence or total variation distance), rather than trying to recover an exact graph from the Markov equivalence class of  $P$ .

*Polytrees* are a subclass of Bayesian networks where the undirected graph underlying the DAG is a forest, i.e., there is no cycle for the undirected version of the DAG; a polytree with maximum in-degree  $d$  is also known as a  $d$ -polytree. With an infinite number of samples, one can recover the

37 DAG of a non-degenerate polytree in the equivalence class with the Chow–Liu algorithm [Chow and  
 38 Liu, 1968] and some additional conditional independence tests [Rebane and Pearl, 1988]. However,  
 39 this algorithm does *not* work in the finite sample regime. The only known result for learning polytrees  
 40 with finite sample guarantees is for 1-polytrees [Bhattacharyya et al., 2021]. Furthermore, in the  
 41 agnostic setting, when the goal is to find the closest polytree distribution to an arbitrary distribution  
 42  $P$ , the learning problem becomes NP-hard [Dasgupta, 1999].

43 In this work, we investigate what happens when the given distribution is a  $d$ -polytree, for  $d > 1$ . *Are*  
 44  *$d$ -polytrees computationally hard to learn in the realizable PAC-learning setting?* One motivation for  
 45 studying polytrees is due to a recent work of Gao and Aragam [2021] which shows that polytrees  
 46 are easier to learn than general Bayes nets due to the underlying graph being a tree, allowing typical  
 47 causal assumptions such as faithfulness to be dropped when designing efficient learning algorithms.

48 **Contributions.** Our main contribution is a sample-efficient algorithm for proper Bayes net learning  
 49 in the realizable setting, when provided with the ground truth skeleton (i.e., the underlying forest).  
 50 Crucially, our result does not require any distributional assumptions such as strong faithfulness, etc.

51 **Theorem 1.** *There exists an algorithm which, given  $m$  samples from a polytree  $P$  over  $\Sigma^n$ , accuracy*  
 52 *parameter  $\varepsilon > 0$ , failure probability  $\delta$ , as well as its maximum in-degree  $d$  and the explicit description*  
 53 *of the ground truth skeleton of  $P$ , outputs a  $d$ -polytree  $\hat{P}$  such that  $d_{\text{KL}}(P \parallel \hat{P}) \leq \varepsilon$  with success*  
 54 *probability at least  $1 - \delta$ , as long as*

$$m = \tilde{\Omega}\left(\frac{n \cdot |\Sigma|^{d+1}}{\varepsilon} \log \frac{1}{\delta}\right).$$

55 *Moreover, the algorithm runs in time polynomial in  $m$ ,  $|\Sigma|^d$ , and  $n^d$ .*

56 We remark that our result holds when even given only an upper bound on the true in-degree  $d$ .  
 57 In particular, our result provides, for constant  $|\Sigma|$ ,  $d$ , an upper bound of  $\tilde{O}(n/\varepsilon)$  on the sample  
 58 complexity of learning  $O(1)$ -polytrees. Note that this dependence on the dimension  $n$  and the  
 59 accuracy parameter  $\varepsilon$  are optimal, up to logarithmic factors: indeed, we establish in Theorem 15 an  
 60  $\Omega(n/\varepsilon)$  sample complexity lower bound for this question, even for  $d = 2$  and  $|\Sigma| = 2$ .<sup>1</sup>

61 We also state sufficient conditions on the distribution that enable recovery of the ground truth skeleton.  
 62 Informally, we require that the data processing inequality hold in a strong sense with respect to the  
 63 edges in the skeleton graph. Under these conditions, combining with our main result in Theorem 1,  
 64 we obtain a polynomial-time PAC algorithm to learn bounded-degree polytrees from samples.

65 **Other related work.** Structure learning of Bayesian networks is an old problem in machine learning  
 66 and statistics that has been intensively studied; see, for example, Chapter 18 of Koller and Friedman  
 67 [2009]. Many of the early approaches required faithfulness, a condition which permits learning  
 68 of the Markov equivalence class, e.g. Spirtes and Glymour [1991], Chickering [2002], Friedman  
 69 et al. [2013]. Finite sample complexity of such algorithms assuming faithfulness-like conditions has  
 70 also been studied, e.g. Friedman and Yakhini [1996]. An alternate line of more modern work has  
 71 considered various other distributional assumptions that permits for efficient learning, e.g., Chickering  
 72 and Meek [2002], Hoyer et al. [2008], Shimizu et al. [2006], Peters and Bühlmann [2014], Ghoshal  
 73 and Honorio [2017], Park and Raskutti [2017], Aragam et al. [2019], with the latter three also showing  
 74 analyzing finite sample complexity. Specifically for polytrees, Rebane and Pearl [1988], Geiger et al.  
 75 [1990] studied recovery of the DAG for polytrees under the infinite sample regime. Gao and Aragam  
 76 [2021] studied the more general problem of learning Bayes nets, and their sufficient conditions  
 77 simplified in the setting of polytrees. Their approach emphasize more on the exact recovery, and thus  
 78 the sample complexity has to depend on the minimum gap of some key mutual information terms. In  
 79 contrast, we allow the algorithm to make mistakes when certain mutual information terms are too  
 80 small to detect for the given sample complexity budget and achieve a PAC-type guarantee. As such,  
 81 once the underlying skeleton is discovered, our sample complexity only depends on the  $d, n, \varepsilon$  and  
 82 not on any distributional parameters.

83 There are existing works on Bayes net learning with tight bounds in total variation distance, with a  
 84 focus on sample complexity (and not necessarily computational efficiency); for instance, [Canonne  
 85 et al., 2020]. Acharya et al. [2018] consider the problem of learning (in TV distance) a bounded-degree  
 86 causal Bayesian network from interventions, assuming the underlying DAG is known.

<sup>1</sup>We remark that [Bhattacharyya et al., 2021, Theorem 7.6] implies an  $\Omega(\frac{n}{\varepsilon} \log \frac{n}{\varepsilon})$  sample complexity lower  
 bound for the analogous question when the skeleton is unknown and  $d = 1$ .

87 **Outline of paper.** We begin with some preliminary notions and related work in [Section 2](#). [Section 3](#)  
 88 then shows how to recover a polytree close in KL divergence, assuming knowledge of the skeleton  
 89 and maximum in-degree. [Section 4](#) gives sufficient conditions to recover the underlying skeleton from  
 90 samples, while [Section 5](#) provides our sample complexity lower bound. We conclude in [Section 6](#)  
 91 with some open directions and defer some full proofs to the appendix.

## 92 2 Preliminaries and tools from previous work

### 93 2.1 Preliminary notions and notation

94 We write the disjoint union as  $\dot{\cup}$ . For any set  $A$ , let  $|A|$  denotes its size. We use hats to denote  
 95 estimated quantities, e.g.,  $\hat{I}(X; Y)$  will be the estimated mutual information of  $I(X; Y)$ . We employ  
 96 the standard asymptotic notation  $O(\cdot)$ ,  $\Omega(\cdot)$ ,  $\Theta(\cdot)$ , and write  $\tilde{O}(\cdot)$  to omit polylogarithmic factors.  
 97 Throughout, we identify probability distributions over discrete sets with their probability mass  
 98 functions (pmf). We use  $d^*$  to denote the true maximum in-degree of the underlying polytree.

### 99 2.2 Probability distribution definitions

100 We begin by defining KL divergence and squared Hellinger distances for a pair of discrete distributions  
 101 with the same support.

102 **Definition 2** (KL divergence and squared Hellinger distance). For distributions  $P, Q$  defined on  
 103 the same discrete support  $\mathcal{X}$ , their KL divergence and squared Hellinger distances are defined as  
 104  $d_{\text{KL}}(P \parallel Q) = \sum_{x \in \mathcal{X}} P(x) \log \frac{P(x)}{Q(x)}$  and  $d_{\text{H}}^2(P, Q) = 1 - \sum_{x \in \mathcal{X}} \sqrt{P(x) \cdot Q(x)}$  respectively.

105 Abusing notation, for a distribution  $P$  on variables  $X = \{X_1, \dots, X_n\}$ , we write  $P_S$  to mean the  
 106 projection of  $P$  to the subset of variables  $S \subseteq X$  and  $P_G$  to mean the projection of  $P$  onto a graph  $G$ .  
 107 More specifically, we have  $P_G(x_1, \dots, x_n) = \prod_{x \in X} P(x \mid \pi_G(x))$  where  $\pi_G(x)$  are the parents of  $x$   
 108 in  $G$ . Note that  $P_G$  is the closest distribution<sup>2</sup> on  $G$  to  $P$  in  $d_{\text{KL}}$ , i.e.  $P_G = \arg\min_{Q \in G} d_{\text{KL}}(P \parallel Q)$ .  
 109 By [Chow and Liu \[1968\]](#), we also know that

$$d_{\text{KL}}(P, P_G) = - \sum_{i=1}^n I(X_i; \pi_G(X_i)) - H(P_X) + \sum_{i=1}^n H(P_{X_i}), \quad (1)$$

110 where  $H$  is the entropy function. Note that only the first term depends on the graph structure of  $G$ .

111 By maximizing the sum of mutual information (the negation of the first term in (1)), we can obtain an  
 112  $\varepsilon$ -approximated graph  $G$  such that  $d_{\text{KL}}(P \parallel P_G) \leq \varepsilon$ . In the case of tree-structured distributions, this  
 113 can be efficiently solved by using any maximum spanning tree algorithm; a natural generalization to  
 114 bounded degree bayes nets remains open due to the hardness of solving the underlying optimization  
 115 problem [[Höffgen, 1993](#)]. If any valid topological ordering of the target Bayes net  $P$  is present, then  
 116 an efficient greedy approach is able to solve the problem.

117 **Definition 3** ((Conditional) Mutual Information). Given a distribution  $P$ , the mutual information of  
 118 two random variables  $X$  and  $Y$ , supported on  $\mathcal{X}$  and  $\mathcal{Y}$  respectively, is defined as

$$I(X; Y) = \sum_{x \in \mathcal{X}, y \in \mathcal{Y}} P(x, y) \cdot \log \left( \frac{P(x, y)}{P(x) \cdot P(y)} \right).$$

119 Conditioning on a third random variable  $Z$ , supported on  $\mathcal{Z}$ , the conditional mutual information is  
 120 defined as:

$$I(X; Y \mid Z) = \sum_{x \in \mathcal{X}, y \in \mathcal{Y}, z \in \mathcal{Z}} P(x, y, z) \cdot \log \left( \frac{P(x, y, z) \cdot P(z)}{P(x, z) \cdot P(y, z)} \right).$$

121

122 By adapting a known testing result from [[Bhattacharyya et al., 2021](#), Theorem 1.3], we can obtain the  
 123 following corollary, which we will use. We provide the full derivation in the supplementary materials.

<sup>2</sup>One can verify this using [Bhattacharyya et al. \[2021, Lemma 3.3\]](#): For any distribution  $Q$  defined on graph  $G$ , we have  $d_{\text{KL}}(P \parallel Q) - d_{\text{KL}}(P \parallel P_G) = \sum_{v \in V} P(\pi_G(v)) \cdot d_{\text{KL}}(P(v \mid \pi_G(v)) \parallel Q(v \mid \pi_G(v))) \geq 0$ .

124 **Corollary 4** (Conditional Mutual Information Tester, adapted from [Bhattacharyya et al., 2021, Theo-  
 125 rem 1.3]). Fix any  $\varepsilon > 0$ . Let  $(X, Y, Z)$  be three random variables over  $\Sigma_X, \Sigma_Y, \Sigma_Z$  respectively.  
 126 Given the empirical distribution  $(\hat{X}, \hat{Y}, \hat{Z})$  over a size  $N$  sample of  $(X, Y, Z)$ , there exists a universal  
 127 constant  $0 < C < 1$  so that for any

$$N \geq \Theta \left( \frac{|\Sigma_X| \cdot |\Sigma_Y| \cdot |\Sigma_Z|}{\varepsilon} \cdot \log \frac{|\Sigma_X| \cdot |\Sigma_Y| \cdot |\Sigma_Z|}{\delta} \cdot \log \frac{|\Sigma_X| \cdot |\Sigma_Y| \cdot |\Sigma_Z| \cdot \log(1/\delta)}{\varepsilon} \right),$$

128 the following statements hold with probability  $1 - \delta$ :

129 (1) If  $I(X; Y | Z) = 0$ , then  $\hat{I}(X; Y | Z) < C \cdot \varepsilon$ .

130 (2) If  $\hat{I}(X; Y | Z) \geq C \cdot \varepsilon$ , then  $I(X; Y | Z) > 0$ .

131 (3) If  $\hat{I}(X; Y | Z) \leq C \cdot \varepsilon$ , then  $I(X; Y | Z) < \varepsilon$ .

132 Unconditional statements involving  $I(X; Y)$  and  $\hat{I}(X; Y)$  hold similarly by choosing  $|\Sigma_Z| = 1$ .

### 133 2.3 Graph definitions

134 Let  $G = (V, E)$  be a graph on  $|V| = n$  vertices and  $|E|$  nodes where adjacencies are denoted with  
 135 dashes, e.g.  $u - v$ . For any vertex  $v \in V$ , we use  $N(v) \subseteq V \setminus \{v\}$  to denote the neighbors of  $v$  and  
 136  $d(v) = |N(v)|$  to denote  $v$ 's degree. An undirected cycle is a sequence of  $k \geq 3$  vertices such that  
 137  $v_1 - v_2 - \dots - v_k - v_1$ . For any subset  $E' \subseteq E$  of edges, we say that the graph  $H = (V, E')$  is the  
 138 edge-induced subgraph of  $G$  with respect to  $E'$ .

139 For oriented graphs, we use arrows to denote directed edges, e.g.  $u \rightarrow v$ . We denote  $\pi(v)$  to denote  
 140 the parents of  $v$  and  $d^{in}(v)$  to denote  $v$ 's incoming degree. An interesting directed subgraph on three  
 141 vertices is the v-structure, where  $u \rightarrow v \leftarrow w$  and  $u \not\rightarrow w$ ; we say that  $v$  is the center of the v-structure.  
 142 In this work, we study a generalized higher-degree version of v-structures: we define the notion  
 143 of *deg- $\ell$  v-structure* as a node  $v$  with  $\ell \geq 2$  parents  $u_1, u_2, \dots, u_\ell$ . We say that a deg- $\ell$  v-structure  
 144 is said to be  $\varepsilon$ -strong if we can reliably identify them in the finite sample regime. In our context,  
 145 it means that for all  $k \in [\ell]$ ,  $I(u_k; \{u_1, u_2, \dots, u_\ell\} \setminus u_k | v) \geq C \cdot \varepsilon$ , for the universal constant  
 146  $0 < C < 1$  appearing in Corollary 4. A directed acyclic graph (DAG) is a fully oriented graph  
 147 without any directed cycles (a sequence of  $k \geq 3$  vertices such that  $v_1 \rightarrow v_2 \rightarrow \dots \rightarrow v_k \rightarrow v_1$ ) and  
 148 are commonly used to represent the conditional dependencies of a Bayes net.

149 For any partially directed graph, an *acyclic completion* or *consistent extension* refers to an assignment  
 150 of edge directions to unoriented edges such that the resulting fully directed graph has no directed  
 151 cycles; we say that a DAG  $G$  is *consistent* with a partially directed graph  $H$  if  $G$  is an acyclic  
 152 completion of  $H$ . Meek rules are a set of 4 edge orientation rules that are sound and complete with  
 153 respect to any given set of arcs that has a consistent DAG extension Meek [1995]. Given any edge  
 154 orientation information, one can always repeatedly apply Meek rules till a fixed point to maximize  
 155 the number of oriented arcs. One particular orientation rule (Meek R1) orients  $b \rightarrow c$  whenever  
 156 a partially oriented graph has the configuration  $a \rightarrow b - c$  and  $a \not\rightarrow c$  so as to avoid forming a new  
 157 v-structure of the form  $a \rightarrow b \leftarrow c$ . In the same spirit, we define Meek R1( $d^*$ ) to orient all incident  
 158 unoriented edges away from  $v$  whenever  $v$  already has  $d^*$  parents in a partially oriented graph.

159 The *skeleton*  $\text{skel}(G)$  of a graph  $G$  refers to the resulting undirected graph after unorienting all edges  
 160 in  $G$ , e.g. see Fig. 1. A graph  $G$  is a *polytree* if  $\text{skel}(G)$  is a forest. For  $d \geq 1$ , a polytree  $G$  is a  
 161  $d$ -polytree if all vertices in  $G$  have at most  $d$  parents. Without loss of generality, by picking the  
 162 minimal  $d$ , we may assume that  $d$ -polytrees have a vertex with  $d$  parents. When we *freely orient* a  
 163 forest, we pick arbitrary root nodes in the connected components and orient to form a 1-polytree.

## 164 3 Recovering a good orientation given a skeleton and degree bound

165 In this section, we describe and analyze an algorithm for estimating a probability distribution  $P$  that  
 166 is defined on a  $d^*$ -polytree  $G^*$ . We assume that we are given  $\text{skel}(G^*)$  and  $d$  as input.

167 Note that for some distributions there could be more than one ground truth graph, e.g. when the  
 168 Markov equivalence class has multiple graphs. In such situations, for analysis purposes, we are free  
 169 to choose any graph that  $P$  is Markov with respect to. As the mutual information scores<sup>3</sup> are the  
 170 same for any graphs that  $P$  is Markov with respect to, the choice of  $G^*$  does not matter here.

<sup>3</sup>The mutual information score is the sum of the mutual information terms as in Eq. (1).

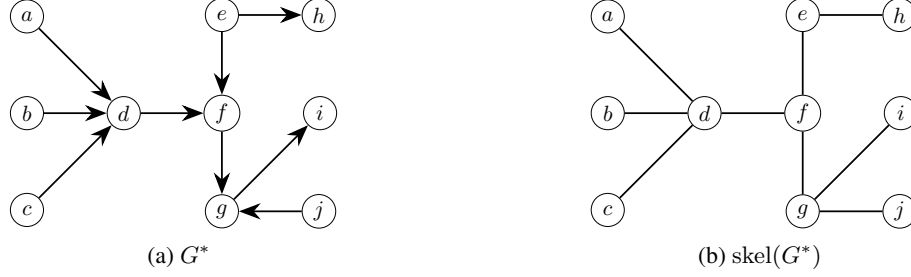

Figure 1: Running polytree example with  $d^* = 3$  where  $I(a; b, c) = I(b; a, c) = I(c; a, b) = 0$  due to the deg-3 v-structure centered at  $d$ . Since  $I(a; f | d) = 0$ , **Corollary 4** tells us that  $\hat{I}(a; f | d) \leq C \cdot \varepsilon$ . Thus, we will *not* detect  $a \rightarrow d \rightarrow f$  erroneously as a strong deg-2 v-structure  $a \rightarrow d \leftarrow f$ .

### 171 3.1 Algorithm

172 At any point in the algorithm, let us define the following sets. Let  $N(v)$  be the set of all neighbors of  $v$   
 173 in  $\text{skel}(G^*)$ . Let  $N^{\text{in}}(v) \subseteq N(v)$  be the current set of incoming neighbors of  $v$ . Let  $N^{\text{out}}(v) \subseteq N(v)$   
 174 be the current set of outgoing neighbors of  $v$ . Let  $N^{\text{un}}(v) \subseteq N(v)$  be the current set of unoriented  
 175 neighbors of  $v$ . That is,

$$N(v) = N^{\text{in}}(v) \dot{\cup} N^{\text{out}}(v) \dot{\cup} N^{\text{un}}(v)$$

---

**Algorithm 1** Algorithm for known skeleton and max in-degree.

---

- Input:** Skeleton  $\text{skel}(G^*) = (V, E)$ , max in-degree  $d^*$ , threshold  $\varepsilon > 0$ , universal constant  $C$   
**Output:** A complete orientation of  $\text{skel}(G^*)$
- 1: Run Phase 1: Orient strong v-structures (**Algorithm 3**)  $\triangleright \mathcal{O}(n^{d^*})$  time
  - 2: Run Phase 2: Local search and Meek R1( $d^*$ ) (**Algorithm 4**)  $\triangleright \mathcal{O}(n^3)$  time
  - 3: Run Phase 3: Freely orient remaining unoriented edges (**Algorithm 5**)  $\triangleright \mathcal{O}(n)$  time via DFS
  - 4: **return**  $\hat{G}$
- 

176 There are three phases to our algorithm. In Phase 1, we orient strong v-structures. In Phase 2, we  
 177 locally check if an edge is forced to orient one way or another to avoid incurring too much error. In  
 178 Phase 3, we orient the remaining unoriented edges as a 1-polytree. Since the remaining edges were  
 179 not forced, we may orient the remaining edges in an arbitrary direction (while not incurring “too  
 180 much error”) as long as the final incoming degrees of any vertex does not increase by more than 1.  
 181 Subroutine **Orient** (**Algorithm 2**) performs the necessary updates when we orient  $u - v$  to  $u \rightarrow v$ .

---

**Algorithm 2** **Orient**: Subroutine to orient edges

---

- Input:** Vertices  $u$  and  $v$  where  $u - v$  is currently unoriented
- 1: Orient  $u - v$  as  $u \rightarrow v$ .
  - 2: Update  $N^{\text{in}}(v)$  to  $N^{\text{in}}(v) \cup \{u\}$  and  $N^{\text{un}}(v)$  to  $N^{\text{un}}(v) \setminus \{u\}$ .
  - 3: Update  $N^{\text{out}}(u)$  to  $N^{\text{out}}(u) \cup \{v\}$  and  $N^{\text{un}}(u)$  to  $N^{\text{un}}(u) \setminus \{v\}$ .
- 

### 182 3.2 Analysis

183 Observe that we perform  $\mathcal{O}(n^{d^*})$  (conditional) mutual information tests in **Algorithm 1**. The following  
 184 lemma (**Lemma 5**) ensures us that *all* our tests will behave as expected with sufficient samples. As  
 185 such, in the rest of our analysis, we analyze under the assumption that our tests are correct.

186 **Lemma 5.** Suppose all variables in the Bayesian network has alphabet  $\Sigma$ . For  $\varepsilon' > 0$ , with

$$m \in \mathcal{O} \left( \frac{|\Sigma|^{d^*+1}}{\varepsilon'} \cdot \log \frac{|\Sigma|^{d^*+1} \cdot n^{d^*}}{\delta} \cdot \log \frac{|\Sigma|^{d^*+1} \cdot \log(n^{d^*}/\delta)}{\varepsilon'} \right)$$

187 empirical samples,  $\mathcal{O}(n^{d^*})$  statements of the following forms, where  $\mathbf{X}$  and  $\mathbf{Y}$  are variable sets of  
 188 size  $|\mathbf{X} \dot{\cup} \mathbf{Y}| \leq d$  and  $Z$  is possibly  $\emptyset$ , all succeed with probability at least  $1 - \delta$ :

- 189 (1) If  $I(\mathbf{X}; \mathbf{Y} \mid Z) = 0$ , then  $\hat{I}(\mathbf{X}; \mathbf{Y} \mid Z) < C \cdot \varepsilon'$ ,  
 190 (2) If  $\hat{I}(\mathbf{X}; \mathbf{Y} \mid Z) \geq C \cdot \varepsilon'$ , then  $I(\mathbf{X}; \mathbf{Y} \mid Z) > 0$ ,  
 191 (3) If  $\hat{I}(\mathbf{X}; \mathbf{Y} \mid Z) \leq C \cdot \varepsilon'$ , then  $I(\mathbf{X}; \mathbf{Y} \mid Z) < \varepsilon'$ .

192 *Proof.* Use [Corollary 4](#) and apply union bound over  $\mathcal{O}(n^d)$  tests.  $\square$

193 Recall that  $\pi(v)$  is the set of true parents of  $v$  in  $G^*$ . Let  $H$  be the forest induced by the remaining  
 194 unoriented edges after phase 2. Let  $\hat{G}$  be returned graph of the algorithm [1](#). Let us denote the final  
 195  $N^{in}(v)$  as  $\pi^{in}(v)$  at the end of Phase 2, just before freely orienting, i.e. the vertices pointing into  $v$   
 196 in  $\hat{G} \setminus H$ . Let  $\pi^{un}(v) = \pi(v) \setminus \pi^{in}(v)$  be the set of ground truth parents that are not identified in  
 197 Phase 1. Since the algorithm does not make mistakes for orientations in  $\hat{G} \setminus H$  ([Lemma 6](#)), all edges  
 198 of in  $\pi^{un}(v)$  will be unoriented.

199 **Lemma 6.** Any oriented arc in  $\hat{G} \setminus H$  is a ground truth orientation. That is, any vertex parent set  
 200 in  $\hat{G} \setminus H$  is a subset of  $\pi(v)$ , i.e.  $\pi^{in}(v) \subseteq \pi(v)$ , and  $N^{in}(v)$  at any time during the algorithm will  
 201 have  $N^{in}(v) \subseteq \pi^{in}(v)$ .

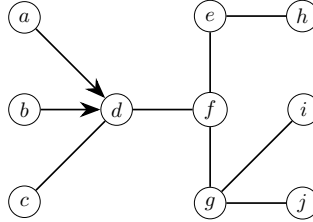

Figure 2: Suppose we have the following partially oriented graph in the execution of [Algorithm 4](#) (after Phase 1). Since  $N^{in}(d) = \{a, b\}$ , we will check the edge orientations of  $c - d$  and  $f - d$ . Since  $I(f; \{a, b\} \mid d) = 0$ , we will have  $\hat{I}(f; \{a, b\} \mid d) \leq \varepsilon$ , so we will *not* erroneously orient  $f \rightarrow d$ . Meanwhile,  $I(c; \{a, b\}) = 0$ , we will have  $\hat{I}(c; \{a, b\}) \leq \varepsilon$ , so we will *not* erroneously orient  $d \rightarrow c$ .

202 Let  $\hat{\pi}(v)$  be the proposed parents of  $v$  output by [Algorithm 1](#). The KL divergence between the true  
 203 distribution and our output distribution is essentially  $\sum_{v \in V} I(v; \pi(v)) - \sum_{v \in V} I(v; \hat{\pi}(v))$  as the  
 204 structure independent terms will cancel out.

205 To get a bound on the KL divergence, we will upper bound  $\sum_{v \in V} I(v; \pi(v))$  and lower bound  
 206  $\sum_{v \in V} I(v; \hat{\pi}(v))$ . To upper bound  $I(v; \pi(v))$  in terms of  $\pi^{in}(v) \subseteq \pi(v)$  and  $I(v; u)$  for  $u \in$   
 207  $\pi^{un}(v)$ , we use [Lemma 8](#) which relies on repeated applications of [Lemma 7](#). To lower bound  
 208  $\sum_{v \in V} I(v; \hat{\pi}(v))$ , we use [Lemma 9](#).

209 **Lemma 7.** Fix any vertex  $v$ , any  $S \subseteq \pi^{un}(v)$ , and any  $S' \subseteq \pi^{in}(v)$ . If  $S \neq \emptyset$ , then there exists a  
 210 vertex  $u \in S \cup S'$  with

$$I(v; S \cup S') \leq I(v; S \cup S' \setminus \{u\}) + I(v; u) + \varepsilon. \quad (2)$$

211 **Lemma 8.** For any vertex  $v$  with  $\pi^{in}(v)$ , we can show that

$$I(v; \pi(v)) \leq \varepsilon \cdot |\pi(v)| + I(v; \pi^{in}(v)) + \sum_{u \in \pi^{un}(v)} I(v; u).$$

---

**Algorithm 3** Phase 1: Orient strong v-structures

---

```

1:  $d \leftarrow d^*$ 
2: while  $d \geq 2$  do
3:   for  $v \in V$  do ▷ Arbitrary order
4:     Let  $\mathcal{N}_d \subseteq 2^{N(v)}$  be the set of  $d$  neighbors of  $v$  ▷  $|\mathcal{N}_d| = \binom{|N(v)|}{d}$ 
5:     for  $S \in \mathcal{N}_d$  s.t.  $|S| = d$ ,  $|S \cup N^{in}(v)| \leq d^*$ , and  $\hat{I}(u; S \setminus \{u\} \mid v) \geq C \cdot \varepsilon, \forall u \in S$  do
6:       for  $u \in S$  do ▷ Strong deg- $d$  v-structure
7:         ORIENT( $u, v$ )
8:    $d \leftarrow d - 1$  ▷ Decrement degree bound

```

---



---

**Algorithm 4** Phase 2: Local search and Meek  $R1(d^*)$ 

---

```
1: do ▷  $\mathcal{O}(n)$  iterations,  $\mathcal{O}(n^2)$  time per iteration
2:   if  $\exists v \in V$  such that  $|N^{in}(v)| = d^*$  and  $N^{un}(v) \neq \emptyset$  then ▷ Meek  $R1(d^*)$ 
3:     Orient all unoriented arcs away from  $v$ 
4:     Update  $N^{out}(v) \leftarrow N^{out}(v) \cup N^{un}(v)$ ;  $N^{un}(v) \leftarrow \emptyset$ 
5:   for every node  $v \in V$  do
6:     if  $1 \leq |N^{in}(v)| < d^*$  then
7:       for every  $u \in N^{un}(v)$  do
8:         if  $\hat{I}(u; N^{in}(v) \mid v) > C \cdot \varepsilon$  then ORIENT( $u, v$ )
9:         else if  $\hat{I}(u; N^{in}(v)) > C \cdot \varepsilon$  then ORIENT( $v, u$ )
10: while new edges are being oriented
```

---

---

**Algorithm 5** Phase 3: Freely orient remaining unoriented edges

---

- 1: Let  $H$  be the forest induced by the remaining unoriented edges.
  - 2: Freely orient  $H$  as a 1-polytree (i.e. maximum in-degree in  $H$  is 1).
  - 3: Let  $\hat{G}$  be the combination of the oriented  $H$  and the previously oriented arcs.
  - 4: **return**  $\hat{G}$
- 

212 In Phase 3, we increase the incoming edges to any vertex by at most one. The following lemma tells  
213 us that we lose at most<sup>4</sup> an additive  $\varepsilon$  error per vertex.

214 **Lemma 9.** *Consider an arbitrary vertex  $v$  with  $\pi^{in}(v)$  at the start of Phase 3. If Phase 3 orients*  
215  *$u \rightarrow v$  for some  $u - v \in H$ , then*

$$I(v; \pi^{in}(v) \cup \{u\}) \geq I(v; \pi^{in}(v)) + I(v; u) - \varepsilon.$$

216 By using [Lemma 8](#) and [Lemma 9](#), we can show our desired KL divergence bound ([Lemma 10](#)).

217 **Lemma 10.** *Let  $\pi(v)$  be the true parents of  $v$ . Let  $\hat{\pi}(v)$  be the proposed parents of  $v$  output by our*  
218 *algorithm. Then,*

$$\sum_{v \in V} I(v; \pi(v)) - \sum_{v \in V} I(v; \hat{\pi}(v)) \leq n \cdot (d^* + 1) \cdot \varepsilon.$$

219 With these results in hand, we are ready to establish our main theorem:

220 *Proof of [Theorem 1](#).* We first combine [Lemma 10](#) and [Lemma 5](#) with  $\varepsilon' = \frac{\varepsilon}{2n \cdot (d^* + 1)}$  in order to  
221 obtain an orientation  $\hat{G}$  which is close to  $G^*$ . Now, recall that there exist efficient algorithms for  
222 estimating the parameters of a Bayes net with in-degree- $d$  (note that this includes  $d$ -polytrees)  $P$   
223 once a close-enough graph  $\hat{G}$  is recovered [[Dasgupta, 1997](#), [Bhattacharyya et al., 2020](#)], with sample  
224 complexity  $\tilde{\mathcal{O}}(|\Sigma|^d n / \varepsilon)$ . Denote the final output  $\hat{P}_{\hat{G}}$ , a distribution that is estimated using the  
225 conditional probabilities implied by  $\hat{G}$ . One can bound the KL divergences as follows:

$$d_{\text{KL}}(P \parallel P_{\hat{G}}) - d_{\text{KL}}(P \parallel P_{G^*}) \leq \varepsilon/2 \quad \text{and} \quad d_{\text{KL}}(P \parallel \hat{P}_{\hat{G}}) - d_{\text{KL}}(P \parallel P_{\hat{G}}) \leq \varepsilon/2.$$

226 Thus, we see that

$$d_{\text{KL}}(P \parallel \hat{P}_{\hat{G}}) \leq \varepsilon + d_{\text{KL}}(P \parallel P_{G^*}) = \varepsilon.$$

227 □

## 228 4 Skeleton assumption

229 In this section, we present a set of *sufficient* assumptions ([Assumption 11](#)) under which the Chow-Liu  
230 algorithm will recover the true skeleton even while with finite samples.

---

<sup>4</sup>Orienting “freely” could also increase the mutual information score and this is considering the worst case.

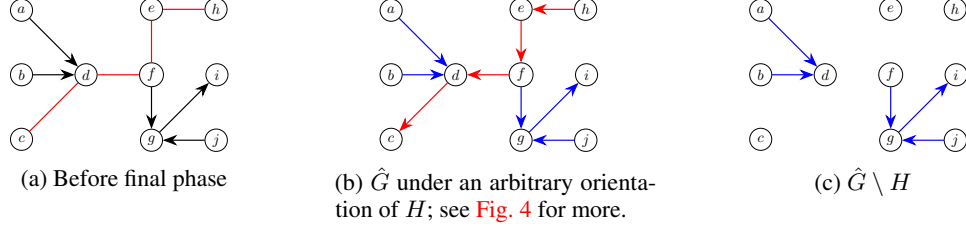

Figure 3: Consider the partially oriented graph before the final phase, where  $H$  is the edge-induced subgraph on the unoriented edges in red. Since  $d^* = 3$  is known, we can conclude that  $g \rightarrow i$  was oriented due to a local search step and not due to Meek  $R1(3)$ . We have the following sets before the final phase:  $\pi^{in}(c) = \{a, b\}$ ,  $\pi^{in}(g) = \{f, j\}$ ,  $\pi^i = \{g\}$ ,  $\pi^{un}(d) = \{c\}$ ,  $\pi^{un}(f) = \{d, e\}$ , and  $\pi^{un}(e) = \{h\}$ . With respect to the chosen orientation of  $H$  and the notation in Lemma 10, we have  $A = \{c, d, f, e, h\}$ ,  $a_c = d$ ,  $a_d = f$ ,  $a_f = e$ , and  $a_e = h$ . Observe that the  $\pi^{un}$ 's and  $a$ 's are two different ways to refer to the set of red edges of  $H$ .

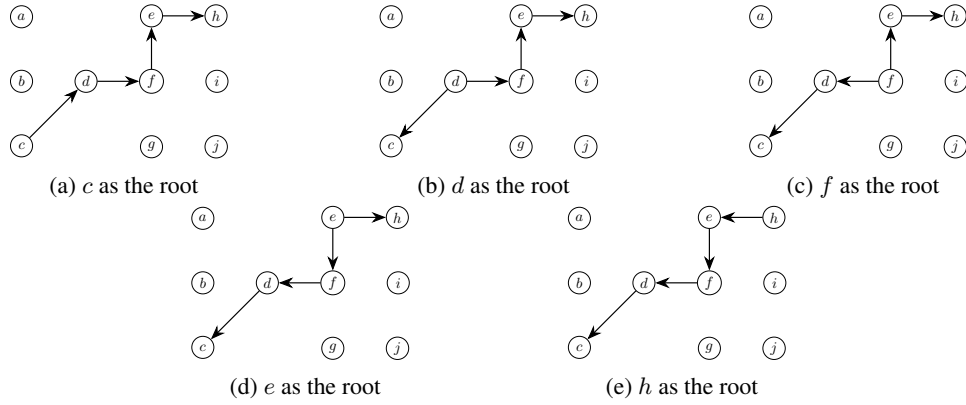

Figure 4: The five different possible orientations of  $H$ . Observe that the ground truth orientation of these edges is inconsistent with all five orientations shown here.

**Assumption 11.** For any given distribution  $P$ , there exists a constant  $\varepsilon_P > 0$  such that:

(1) For every pair of nodes  $u$  and  $v$ , if there exists a path  $u \cdots v$  of length greater than 2 in  $G^*$ , then then  $I(u; v) + 3 \cdot \varepsilon_P \leq I(a; b)$  for every pair of adjacent vertices  $a - b$  in the path.

(2) For every pair of directly connected nodes  $a - b$  in  $G^*$ ,  $I(a; b) \geq 3 \cdot \varepsilon_P$ .

Suppose there is a large enough gap of  $\varepsilon_P$  between edges in  $G^*$  and edges outside of  $G^*$ . Then, with  $\mathcal{O}(1/\varepsilon_P^2)$  samples, each estimated mutual information  $\hat{I}(a; b)$  will be sufficiently close to the true mutual information  $I(a; b)$ . Thus, running the Chow-Liu algorithm (which is essentially maximum spanning tree on the estimated mutual information on each pair of vertices) recovers  $\text{skel}(G^*)$ .

**Lemma 12.** Under Assumption 11, running the Chow-Liu algorithm on the  $m$ -sample empirical estimates  $\{\hat{I}(u; v)\}_{u, v \in V}$  recovers a ground truth skeleton with high probability when  $m \geq \Omega(\frac{\log n}{\varepsilon_P^2})$ .

Combining Lemma 12 with our algorithm Algorithm 1, one can learn a polytree that is  $\varepsilon$ -close in KL with  $\tilde{\mathcal{O}}\left(\max\left\{\frac{\log(n)}{\varepsilon_P^2}, \frac{2^d \cdot n}{\varepsilon}\right\}\right)$  samples, where  $\varepsilon_P$  depends on the distribution  $P$ .

## 5 Lower bound

In this section, we show that  $\Omega(n/\varepsilon)$  samples are necessary even when a known skeleton is provided. For constant in-degree  $d$ , this shows that our proposed algorithm in Section 3 is sample-optimal up to logarithmic factors.

We first begin by showing a lower bound of  $\Omega(1/\varepsilon)$  on a graph with three vertices, even when the skeleton is given. Let  $G_1$  be  $X \rightarrow Z \rightarrow Y$  and  $G_2$  be  $X \rightarrow Z \leftarrow Y$ , such that  $\text{skel}(G_1) = \text{skel}(G_2)$  is  $X - Z - Y$ . Now define  $P_1$  and  $P_2$  as follows:



$$P_1 : \begin{cases} X \sim \text{Bern}(1/2) \\ Z = \begin{cases} X & \text{w.p. } 1/2 \\ \text{Bern}(1/2) & \text{w.p. } 1/2 \end{cases} \\ Y = \begin{cases} Z & \text{w.p. } \sqrt{\varepsilon} \\ \text{Bern}(1/2) & \text{w.p. } 1 - \sqrt{\varepsilon} \end{cases} \end{cases} \quad P_2 : \begin{cases} X \sim \text{Bern}(1/2) \\ Y \sim \text{Bern}(1/2) \\ Z = \begin{cases} X & \text{w.p. } 1/2 \\ Y & \text{w.p. } \sqrt{\varepsilon} \\ \text{Bern}(1/2) & \text{w.p. } 1/2 - \sqrt{\varepsilon} \end{cases} \end{cases} \quad (3)$$

The intuition is that we keep the edge  $X \rightarrow Z$  “roughly the same” and tweak the edge  $Y \rightarrow Z$  between the distributions. We define  $P_{i,G}$  as projecting  $P_i$  onto  $G$ . One can check that the following holds (see Supplemental for the detailed calculations):

**Lemma 13.** *Let  $G_1$  be  $X \rightarrow Z \rightarrow Y$  and  $G_2$  be  $X \rightarrow Z \leftarrow Y$ , such that  $\text{skel}(G_1) = \text{skel}(G_2)$  is  $X - Z - Y$ . With respect to Eq. (3), we have the following:*

1.  $d_H^2(P_1, P_2) \in \mathcal{O}(\varepsilon)$
2.  $d_{\text{KL}}(P_1 \parallel P_{1,G_1}) = 0$  and  $d_{\text{KL}}(P_1 \parallel P_{1,G_2}) \in \Omega(\varepsilon)$
3.  $d_{\text{KL}}(P_2 \parallel P_{2,G_2}) = 0$  and  $d_{\text{KL}}(P_2 \parallel P_{2,G_1}) \in \Omega(\varepsilon)$

Our hardness result (Lemma 14) is obtained by reducing the problem of finding an  $\varepsilon$ -close graph orientation of  $X - Z - Y$  to the problem of *testing* whether the samples are drawn from  $P_1$  or  $P_2$ : To ensure  $\varepsilon$ -closeness in the graph orientation, one has to correctly determine whether the samples come from  $P_1$  or  $P_2$  and then pick  $G_1$  or  $G_2$  respectively. However, it is well-known that distinguishing two distributions whose squared Hellinger distance is  $\varepsilon$  requires  $\Omega(1/\varepsilon)$  samples (see, e.g., [Bar-Yossef, 2002, Theorem 4.7]).

**Lemma 14.** *Even when given  $\text{skel}(G^*)$ , it takes  $\Omega(1/\varepsilon)$  samples to learn an  $\varepsilon$ -close graph orientation of  $G^*$  for distributions on  $\{0, 1\}^3$ .*

Using the above construction as a gadget, we can obtain a dependency on  $n$  in our lower bound by constructing  $n/3$  independent copies of the above gadget, à la proof strategy of Bhattacharyya et al. [2021, Theorem 7.6]. For some constant  $c > 0$ , we know that a constant  $1/c$  fraction of the gadgets will incur an error or more than  $\varepsilon/n$  if less than  $cn/\varepsilon$  samples are used. The desired result then follows from the tensorization of KL divergence, i.e.,  $d_{\text{KL}}(\prod_i P_i \parallel \prod_i Q_i) = \sum_i d_{\text{KL}}(P_i \parallel Q_i)$ .

**Theorem 15.** *Even when given  $\text{skel}(G^*)$ , it takes  $\Omega(n/\varepsilon)$  samples to learn an  $\varepsilon$ -close graph orientation of  $G^*$  for distributions on  $\{0, 1\}^n$ .*

## 6 Conclusion

In this work, we studied the problem of estimating a distribution defined on a  $d$ -polytree  $P$  with graph structure  $G^*$  using finite observational samples. We designed and analyzed an efficient algorithm that produces an estimate  $\hat{P}$  such that  $d_{\text{KL}}(P \parallel \hat{P}) \leq \varepsilon$  assuming access to  $\text{skel}(G^*)$  and  $d$ . The skeleton  $\text{skel}(G^*)$  is recoverable under Assumption 11 and we show that there is an inherent hardness in the learning problem even under the assumption that  $\text{skel}(G^*)$  is given. For constant  $d$ , our hardness result shows that our proposed algorithm is sample-optimal up to logarithmic factors.

An interesting open question is whether one can extend the hardness result to arbitrary  $d \geq 1$ , or design more efficient learning algorithms for  $d$ -polytrees.

## References

- J. Acharya, A. Bhattacharyya, C. Daskalakis, and S. Kandasamy. Learning and testing causal models with interventions. In *NeurIPS*, pages 9469–9481, 2018.
- B. Aragam, A. Amini, and Q. Zhou. Globally optimal score-based learning of directed acyclic graphs in high-dimensions. *Advances in Neural Information Processing Systems*, 32, 2019.
- Z. Bar-Yossef. *The Complexity of Massive Data Set Computations*. PhD thesis, UC Berkeley, 2002. Adviser: Christos Papadimitriou. Available at [http://web.ee.technion.ac.il/people/zivby/index\\_files/Page1489.html](http://web.ee.technion.ac.il/people/zivby/index_files/Page1489.html).

- 290 A. Bhattacharyya, S. Gayen, K. S. Meel, and N. V. Vinodchandran. Efficient distance approximation  
291 for structured high-dimensional distributions via learning. In *NeurIPS*, 2020.
- 292 A. Bhattacharyya, S. Gayen, E. Price, and N. V. Vinodchandran. Near-optimal learning of tree-  
293 structured distributions by Chow-Liu. In *STOC '21—Proceedings of the 53rd Annual ACM*  
294 *SIGACT Symposium on Theory of Computing*, pages 147–160. ACM, New York, 2021. doi:  
295 10.1145/3406325.3451066. URL <https://doi.org/10.1145/3406325.3451066>.
- 296 C. L. Canonne, I. Diakonikolas, D. M. Kane, and A. Stewart. Testing bayesian networks. *IEEE Trans.*  
297 *Inf. Theory*, 66(5):3132–3170, 2020. Preprint available at arXiv:1612.03156.
- 298 D. M. Chickering. Optimal structure identification with greedy search. *Journal of machine learning*  
299 *research*, 3(Nov):507–554, 2002.
- 300 D. M. Chickering and C. Meek. Finding optimal bayesian networks. In *Proceedings of the Eighteenth*  
301 *Annual Conference on Uncertainty in Artificial Intelligence (UAI 02)*, pages 94–102, 2002.
- 302 D. M. Chickering, D. Heckerman, and C. Meek. Large-sample learning of bayesian networks is  
303 np-hard. *J. Mach. Learn. Res.*, 5:1287–1330, 2004.
- 304 C. K. Chow and C. N. Liu. Approximating discrete probability distributions with dependence trees.  
305 *IEEE Trans. Inf. Theory*, 14(3):462–467, 1968.
- 306 S. Dasgupta. The sample complexity of learning fixed-structure bayesian networks. *Mach. Learn.*,  
307 29(2-3):165–180, 1997.
- 308 S. Dasgupta. Learning polytrees. In *UAI*, pages 134–141. Morgan Kaufmann, 1999.
- 309 N. Friedman and Z. Yakhini. On the sample complexity of learning bayesian networks. In *Proceedings*  
310 *of the Twelfth Annual Conference on Uncertainty in Artificial Intelligence (UAI {96})*, San Francisco,  
311 CA, pages 274–282, 1996.
- 312 N. Friedman, I. Nachman, and D. Pe’er. Learning bayesian network structure from massive datasets:  
313 The "sparse candidate" algorithm. *arXiv preprint arXiv:1301.6696*, 2013.
- 314 M. Gao and B. Aragam. Efficient bayesian network structure learning via local markov boundary  
315 search. *Advances in Neural Information Processing Systems*, 34:4301–4313, 2021.
- 316 D. Geiger, A. Paz, and J. Pearl. Learning causal trees from dependence information. In *AAAI*, pages  
317 770–776. AAAI Press / The MIT Press, 1990.
- 318 A. Ghoshal and J. Honorio. Learning identifiable gaussian bayesian networks in polynomial time and  
319 sample complexity. *Advances in Neural Information Processing Systems*, 30, 2017.
- 320 K.-U. Höffgen. Learning and robust learning of product distributions. In *Proceedings of the sixth*  
321 *annual conference on Computational learning theory*, pages 77–83, 1993.
- 322 P. Hoyer, D. Janzing, J. M. Mooij, J. Peters, and B. Schölkopf. Nonlinear causal discovery with  
323 additive noise models. *Advances in Neural Information Processing Systems*, 21, 2008.
- 324 F. V. Jensen and T. D. Nielsen. *Bayesian networks and decision graphs*, volume 2. Springer, 2007.
- 325 D. Koller and N. Friedman. *Probabilistic Graphical Models - Principles and Techniques*. MIT Press,  
326 2009.
- 327 C. Meek. Causal Inference and Causal Explanation with Background Knowledge. In *Proceedings*  
328 *of the Eleventh Conference on Uncertainty in Artificial Intelligence*, UAI’95, page 403–410, San  
329 Francisco, CA, USA, 1995. Morgan Kaufmann Publishers Inc. ISBN 1558603859.
- 330 G. Park and G. Raskutti. Learning quadratic variance function (qvf) dag models via overdispersion  
331 scoring (ods). *J. Mach. Learn. Res.*, 18:224–1, 2017.
- 332 J. Peters and P. Bühlmann. Identifiability of gaussian structural equation models with equal error  
333 variances. *Biometrika*, 101(1):219–228, 2014.

- 334 G. Rebane and J. Pearl. The recovery of causal poly-trees from statistical data. *Int. J. Approx. Reason.*,  
335 2(3):341, 1988.
- 336 S. Shimizu, P. O. Hoyer, A. Hyvärinen, A. Kerminen, and M. Jordan. A linear non-gaussian acyclic  
337 model for causal discovery. *Journal of Machine Learning Research*, 7(10), 2006.
- 338 P. Spirtes and C. Glymour. An algorithm for fast recovery of sparse causal graphs. *Social science*  
339 *computer review*, 9(1):62–72, 1991.
- 340 L. G. Valiant. A theory of the learnable. In *STOC*, pages 436–445. ACM, 1984.

## A Deferred proofs

### A.1 Adapting the known tester result of Bhattacharyya et al. [2021]

Corollary 4 is adapted from Theorem 1.3 of Bhattacharyya et al. [2021].

**Theorem 16** (Conditional Mutual Information Tester, [Bhattacharyya et al., 2021, Theorem 1.3]). Fix any  $\varepsilon > 0$ . Let  $(X, Y, Z)$  be three random variables over  $\Sigma_X, \Sigma_Y, \Sigma_Z$  respectively. Given the empirical distribution  $(\hat{X}, \hat{Y}, \hat{Z})$  over a size  $N$  sample of  $(X, Y, Z)$ , there exists a universal constant  $0 < C < 1$  so that for any

$$N \geq \Theta \left( \frac{|\Sigma_X| \cdot |\Sigma_Y| \cdot |\Sigma_Z|}{\varepsilon} \cdot \log \frac{|\Sigma_X| \cdot |\Sigma_Y| \cdot |\Sigma_Z|}{\delta} \cdot \log \frac{|\Sigma_X| \cdot |\Sigma_Y| \cdot |\Sigma_Z| \cdot \log(1/\delta)}{\varepsilon} \right),$$

the following results hold with probability  $1 - \delta$ :

1. If  $I(X; Y | Z) = 0$ , then  $I(\hat{X}; \hat{Y} | \hat{Z}) < \varepsilon$ .
2. If  $I(X; Y | Z) \geq \varepsilon$ , then  $I(\hat{X}; \hat{Y} | \hat{Z}) > C \cdot I(X; Y | Z)$ .

Unconditional mutual information statements involving  $I(X; Y)$  and  $I(\hat{X}; \hat{Y})$  hold similarly by treating  $|\Sigma_Z| = 1$ .

In our notation, we use  $\hat{I}(X; Y | Z)$  to mean the mutual information of the empirical distribution  $I(\hat{X}; \hat{Y} | \hat{Z})$ .

**Corollary 4** (Conditional Mutual Information Tester, adapted from [Bhattacharyya et al., 2021, Theorem 1.3]). Fix any  $\varepsilon > 0$ . Let  $(X, Y, Z)$  be three random variables over  $\Sigma_X, \Sigma_Y, \Sigma_Z$  respectively. Given the empirical distribution  $(\hat{X}, \hat{Y}, \hat{Z})$  over a size  $N$  sample of  $(X, Y, Z)$ , there exists a universal constant  $0 < C < 1$  so that for any

$$N \geq \Theta \left( \frac{|\Sigma_X| \cdot |\Sigma_Y| \cdot |\Sigma_Z|}{\varepsilon} \cdot \log \frac{|\Sigma_X| \cdot |\Sigma_Y| \cdot |\Sigma_Z|}{\delta} \cdot \log \frac{|\Sigma_X| \cdot |\Sigma_Y| \cdot |\Sigma_Z| \cdot \log(1/\delta)}{\varepsilon} \right),$$

the following statements hold with probability  $1 - \delta$ :

- (1) If  $I(X; Y | Z) = 0$ , then  $\hat{I}(X; Y | Z) < C \cdot \varepsilon$ .
- (2) If  $\hat{I}(X; Y | Z) \geq C \cdot \varepsilon$ , then  $I(X; Y | Z) > 0$ .
- (3) If  $\hat{I}(X; Y | Z) \leq C \cdot \varepsilon$ , then  $I(X; Y | Z) < \varepsilon$ .

Unconditional statements involving  $I(X; Y)$  and  $\hat{I}(X; Y)$  hold similarly by choosing  $|\Sigma_Z| = 1$ .

*Proof.* Notice in the original proof (1) of the CMI tester [Bhattacharyya et al., 2021, Theorem 1.3], it is possible to change  $\varepsilon$  to  $C \cdot \varepsilon$  by paying a factor  $1/C$  more in sample complexity. We obtain the first statement by doing so.

Suppose  $\hat{I}(X; Y | Z) \geq C \cdot \varepsilon$ . By the contrapositive of the first statement, we have  $I(X; Y | Z) \neq 0$ . Since conditional mutual information is non-negative, we must have  $I(X; Y | Z) > 0$ .

Suppose  $\hat{I}(X; Y | Z) \leq C \cdot \varepsilon$ . Suppose, for a contradiction, that  $I(X; Y | Z) \geq \varepsilon$ . Then, statement 2 of Theorem 16 tells us that  $\hat{I}(X; Y | Z) > C \cdot I(X; Y | Z) \geq C \cdot \varepsilon$ . This is a contradiction to the assumption that  $\hat{I}(X; Y | Z) \leq C \cdot \varepsilon$ . Therefore, we must have  $I(X; Y | Z) < \varepsilon$ .  $\square$

### A.2 Algorithm analysis

The following identity (Lemma 17) of mutual information and two properties about (conditional) mutual information on a polytree (Lemma 18) which will be helpful in our proofs later.

**Lemma 17** (A useful identity). For any variable  $v$  and sets  $A, B \subseteq V \setminus \{v\}$ , we have

$$I(v; A \cup B) = I(v; A) + I(v; B) + I(A; B | v) - I(A; B).$$

*Proof.* By the chain rule for mutual information, we can express  $I(v, A; B)$  in the following two ways:

- 378 1.  $I(v, A; B) = I(v; B) + I(A; B \mid v)$ ;  
 379 2.  $I(v, A; B) = I(A; B) + I(v; B \mid A)$ .

380 So,

$$\begin{aligned} I(v; A \cup B) &= I(v; A) + I(v; B \mid A) \\ &= I(v; A) + I(v, A; B) - I(A; B) \\ &= I(v; A) + I(v; B) + I(A; B \mid v) - I(A; B). \end{aligned}$$

381

□

382 **Lemma 18.** *Let  $v$  be an arbitrary vertex in a Bayesian polytree with parents  $\pi(v)$ . Then, we have*

- 383 1. *For any disjoint subsets  $A, B \subseteq \pi(v)$ ,*

$$I(v; A \cup B) = I(v; A) + I(v; B) + I(A; B \mid v)$$

- 384 2. *For any subset  $A \subseteq \pi(v)$ ,*

$$I(v; A) \geq \sum_{u \in A} I(v; u)$$

385 *Proof.* For the first equality, apply **Lemma 17** with the observation that  $I(A; B) = 0$  since  $A, B \subseteq$   
 386  $\pi(v)$ .

387 For the second inequality, apply the first equality  $|A|$  times with the observation that conditional  
 388 mutual information is non-negative. Suppose  $A = \{a_1, \dots, a_k\}$ . Then,

$$\begin{aligned} I(v; A) &= I(v; \{a_1\}) + I(v; A \setminus \{a_1\}) + I(\{a_1\}; A \setminus \{a_1\} \mid v) \\ &\geq I(v; \{a_1\}) + I(v; A \setminus \{a_1\}) \\ &\dots \\ &\geq \sum_{u \in A} I(v; u) \end{aligned}$$

389

□

390 **Lemma 6.** *Any oriented arc in  $\hat{G} \setminus H$  is a ground truth orientation. That is, any vertex parent set*  
 391 *in  $\hat{G} \setminus H$  is a subset of  $\pi(v)$ , i.e.  $\pi^{in}(v) \subseteq \pi(v)$ , and  $N^{in}(v)$  at any time during the algorithm will*  
 392 *have  $N^{in}(v) \subseteq \pi^{in}(v)$ .*

393 *Proof.* We consider the three cases in which we orient edges within the while loop:

- 394 1. Strong v-structures (in Phase 1)  
 395 2. Forced orientation due to local checks (in Phase 2)  
 396 3. Forced orientation due to Meek  $R1(d^*)$  (in Phase 2)

397 **Case 1: Strong v-structures** Consider an arbitrary strong deg- $d$  v-structure with center  $v$ . That is,  
 398 there is a set  $S$  (all neighbors of  $v$ ) with size  $|S| = d$ , such that  $\hat{I}(u; S \setminus \{u\} \mid v) \geq C \cdot \varepsilon$  for any  
 399  $u \in S$ . So, by **Corollary 4**, we know that  $I(u; S \setminus \{u\} \mid v) > 0$  for all  $u \in S$ .

400 Consider an arbitrary vertex  $u_0 \in S$ . Suppose, for a contradiction, that the ground truth orients *some*  
 401 edge outwards from  $v$ , say  $v \rightarrow u_0$  for some  $u_0 \in S$ . This would imply that  $I(u_0; S \setminus \{u_0\} \mid v) = 0$ .  
 402 This contradicts the fact that we had  $I(u_0; S \setminus \{u_0\} \mid v) > 0$  for any  $u \in S$ . Therefore, for all  $u \in S$ ,  
 403 orienting  $u \rightarrow v$  is a ground truth orientation.

404 **Case 2: Forced orientation due to local checks** Consider an arbitrary vertex  $v$ . Suppose it currently  
 405 has incoming oriented arcs  $N^{in}(v)$  and we are checking for the orientation for an unoriented neighbor  
 406  $u$  of  $v$ . By induction, the existing incoming arcs to  $v$  are ground truth orientations.

407 If the ground truth orients  $u \rightarrow v$ , then  $I(u; N^{in}(v)) = 0$  and we should have  $\hat{I}(u; N^{in}(v)) <$   
 408  $C \cdot \varepsilon \leq \varepsilon$  via **Corollary 4**. Hence, if we detect  $\hat{I}(N^{in}(v); u) > \varepsilon$ , it must be the case that the ground  
 409 truth orientation is  $u \leftarrow v$ , which is what we also orient.

410 Meanwhile, if the ground truth orients  $u \leftarrow v$ , then  $I(u; N^{in}(v) \mid v) = 0$  and we should have  
 411  $\hat{I}(u; N^{in}(v) \mid v) \leq C \cdot \varepsilon \leq \varepsilon$  via **Corollary 4**. Hence, if we detect  $\hat{I}(u; N^{in}(v) \mid v) > \varepsilon$ , it must be  
 412 the case that the ground truth orientation is  $u \rightarrow v$ , which is what we also orient.

413 See **Fig. 2** for an illustration. Note that we may possibly detect both  $\hat{I}(u; N^{in}(v)) \leq \varepsilon$  and  
 414  $\hat{I}(u; N^{in}(v) \mid v) \leq \varepsilon$ . In that case, we leave the edge  $u \sim v$  unoriented.

415 **Case 3: Forced orientation due to Meek  $R1(d^*)$**  Meek  $R1(d^*)$  only triggers when there are  $d^*$   
 416 incoming arcs to a particular vertex. Since oriented arcs are inductively ground truth orientations and  
 417 there are at most  $d^*$  incoming arcs to any vertex, the forced orientations due to Meek  $R1(d^*)$  will  
 418 always be correct.  $\square$

419 **Lemma 7.** Fix any vertex  $v$ , any  $S \subseteq \pi^{un}(v)$ , and any  $S' \subseteq \pi^{in}(v)$ . If  $S \neq \emptyset$ , then there exists a  
 420 vertex  $u \in S \cup S'$  with

$$I(v; S \cup S') \leq I(v; S \cup S' \setminus \{u\}) + I(v; u) + \varepsilon. \quad (2)$$

421 *Proof.* Since  $S \cup S' \subseteq \pi(v)$ , we see that  $I(u; S \cup S' \setminus \{u\}) = 0$ . Furthermore, since  $S \neq \emptyset$ , Phase 1  
 422 guarantees that there exists a vertex  $u \in S$  such that  $\hat{I}(u; S \cup S' \setminus \{u\} \mid v) \leq \varepsilon$ . Since  $0 < C < 1$ ,  
 423 this implies that  $\hat{I}(u; S \cup S' \setminus \{u\} \mid v) \leq C \cdot \varepsilon$  and so **Corollary 4** tells us that  $I(u; S \cup S' \setminus \{u\}) < \varepsilon$ .  
 424 Thus, we get

$$\begin{aligned} & I(v; S \cup S') \\ &= I(v; S \cup S' \setminus \{u\}) + I(v; u) + I(u; S \cup S' \setminus \{u\} \mid v) - I(u; S \cup S' \setminus \{u\}) \\ &= I(v; S \cup S' \setminus \{u\}) + I(v; u) + I(u; S \cup S' \setminus \{u\} \mid v) \\ &\leq I(v; S \cup S' \setminus \{u\}) + I(v; u) + \varepsilon \end{aligned}$$

425  $\square$

426 **Lemma 8.** For any vertex  $v$  with  $\pi^{in}(v)$ , we can show that

$$I(v; \pi(v)) \leq \varepsilon \cdot |\pi(v)| + I(v; \pi^{in}(v)) + \sum_{u \in \pi^{un}(v)} I(v; u).$$

427 *Proof.* Initializing  $S' = \pi^{in}(v)$  and  $S = \pi(v) \setminus \pi^{in}(v) = \pi^{un}(v)$ , we can repeatedly apply **Lemma 7**  
 428 to remove vertices one by one, until  $S = \emptyset$ . Without loss of generality, by relabelling the vertices,  
 429 we may assume that **Lemma 7** removes  $u_1$ , then  $u_2$ , and so on. Let us denote the set of all removed  
 430 vertices by  $U$  and note that some of the removed vertices may come from  $S' = \pi^{in}(v)$ .

$$\begin{aligned} I(v; \pi(v)) &\leq I(v; \pi(v) \setminus \{u_1\}) + I(v; u_1) + \varepsilon && \text{By Lemma 7} \\ &\leq I(v; \pi(v) \setminus \{u_1, u_2\}) + I(v; u_1) + I(v; u_2) + 2\varepsilon && \text{By Lemma 7} \\ &\leq \dots \\ &\leq I(v; \pi(v) \setminus U) + \sum_{u \in U} I(v; u) + \varepsilon \cdot |U| && \text{By Lemma 7} \end{aligned}$$



431 Since  $I(A; B) = 0$  for any  $A \dot{\cup} B \subseteq \pi^{in}(v)$ , we have

$$\begin{aligned}
& I(v; \pi^{in}(v)) \\
&= I(v; \pi^{in}(v) \setminus U) + I(v; \pi^{in}(v) \cap U) + I(\pi^{in}(v) \cap U; \pi^{in}(v) \setminus U \mid v) \quad \text{By Lemma 18} \\
&\geq I(v; \pi^{in}(v) \setminus U) + I(v; \pi^{in}(v) \cap U) \\
&\geq I(v; \pi^{in}(v) \setminus U) + \sum_{u \in \pi^{in}(v) \cap U} I(v; u) \quad \text{By Lemma 18}
\end{aligned}$$

432 where the second last inequality is because  $I(\pi^{in}(v); \pi^{in}(v) \cap U \mid v) \geq 0$ .

$$\begin{aligned}
I(v; \pi(v)) &\leq I(v; \pi^{in}(v) \setminus U) + \sum_{u \in U} I(v; u) + \varepsilon \cdot |U| && \text{From above} \\
&= I(v; \pi^{in}(v) \setminus U) + \sum_{u \in \pi^{in}(v) \cap U} I(v; u) + \sum_{u \in \pi^{un}(v)} I(v; u) + \varepsilon \cdot |U| && \text{Since } \pi^{un} \subseteq U \\
&\leq I(v; \pi^{in}(v)) + \sum_{u \in \pi^{un}(v)} I(v; u) + \varepsilon \cdot |U| && \text{From above} \\
&\leq I(v; \pi^{in}(v)) + \sum_{u \in \pi^{un}(v)} I(v; u) + \varepsilon \cdot |\pi(v)| && \text{Since } U \subseteq \pi(v)
\end{aligned}$$

433

□

434 **Lemma 9.** Consider an arbitrary vertex  $v$  with  $\pi^{in}(v)$  at the start of Phase 3. If Phase 3 orients  
435  $u \rightarrow v$  for some  $u - v \in H$ , then

$$I(v; \pi^{in}(v) \cup \{u\}) \geq I(v; \pi^{in}(v)) + I(v; u) - \varepsilon.$$

436 *Proof.* Since  $u \sim v \in E(H)$  remained unoriented, Phase 2 guarantees that  $\hat{I}(u; \pi^{in}(v) \mid v) \leq \varepsilon$  and  
437  $\hat{I}(u; \pi^{in}(v)) \leq \varepsilon$ . Since  $0 < C < 1$ , we also see that  $\hat{I}(u; \pi^{in}(v) \mid v) \leq C \cdot \varepsilon$  and  $\hat{I}(u; \pi^{in}(v)) \leq$   
438  $C \cdot \varepsilon$  and so **Corollary 4** tells us that  $I(u; \pi^{in}(v) \mid v) \leq \varepsilon$  and  $I(u; \pi^{in}(v)) \leq \varepsilon$ . So,

$$\begin{aligned}
& |I(v; \pi^{in}(v) \cup u) - I(v; \pi^{in}(v)) - I(v; u)| \\
&= |I(u; \pi^{in}(v) \mid v) - I(u; \pi^{in}(v))| \quad \text{By Lemma 17} \\
&= \max\{I(u; \pi^{in}(v) \mid v), I(u; \pi^{in}(v))\} \quad \text{At most one of these term can be non-zero} \\
&\leq \varepsilon
\end{aligned}$$

439

□

440 **Lemma 10.** Let  $\pi(v)$  be the true parents of  $v$ . Let  $\hat{\pi}(v)$  be the proposed parents of  $v$  output by our  
441 algorithm. Then,

$$\sum_{v \in V} I(v; \pi(v)) - \sum_{v \in V} I(v; \hat{\pi}(v)) \leq n \cdot (d^* + 1) \cdot \varepsilon.$$

442 *Proof.* We will argue that this summation is bounded by individually bounding each term in the  
443 summation. The main argument of the proof is that once we identified all the strong v-structures  
444 (and thus cancel out the scores of every strong v-structures), the rest should be roughly the score of a  
445 tree (up to additive  $\varepsilon$  error). Then, since we are guaranteed to be given  $\text{skel}(G^*)$ , the tree scores will  
446 match.

447 Let  $A \subseteq V$  be the set of vertices which receive an additional incoming neighbor in the final phase,  
448 which we denote by  $a_v \in V$ , i.e.  $\hat{\pi}(v) = \pi^{in}(v) \cup \{a_v\}$ . Note that the set of edges  $\{a_v \rightarrow v\}_{v \in A}$  is  
449 exactly the edges of the undirected graph  $H$  in the final phase. See **Fig. 3** for an illustration.

450 To lower bound  $\sum_{v \in V} I(v; \hat{\pi}(v))$ , we can show

$$\begin{aligned}
& \sum_{v \in V} I(v; \hat{\pi}(v)) \\
&= \sum_{v \in A} I(v; \hat{\pi}(v)) + \sum_{v \in V \setminus A} I(v; \hat{\pi}(v)) \\
&\geq \sum_{v \in A} \left( I(v; \hat{\pi}(v) \setminus \{a_v\}) + I(v; a_v) - \varepsilon \right) + \sum_{v \in V \setminus A} I(v; \hat{\pi}(v)) \quad \text{By Lemma 9} \\
&= \sum_{v \in A} I(v; \pi^{in}(v)) + \sum_{v \in A} I(v; a_v) + \sum_{v \in V \setminus A} I(v; \pi^{in}(v)) - |A| \cdot \varepsilon \\
&= \sum_{v \in V} I(v; \pi^{in}(v)) + \sum_{v \in A} I(v; a_v) - |A| \cdot \varepsilon \\
&\geq \sum_{v \in V} I(v; \pi^{in}(v)) + \sum_{v \in A} I(v; a_v) - n\varepsilon \quad \text{Since } A \subseteq V \text{ and } |V| = n
\end{aligned}$$

451 Meanwhile, to upper bound  $\sum_{v \in V} I(v; \pi(v))$ , we can show

$$\begin{aligned}
& \sum_{v \in V} I(v; \pi(v)) \\
&= \sum_{\substack{v \in V \\ \pi^{un}(v) \neq \emptyset}} I(v; \pi(v)) + \sum_{\substack{v \in V \\ \pi^{un}(v) = \emptyset}} I(v; \pi(v)) \\
&\leq \sum_{\substack{v \in V \\ \pi^{un}(v) \neq \emptyset}} \left( \varepsilon \cdot |\pi(v)| + I(v; \pi^{in}(v)) + \sum_{u \in \pi^{un}(v)} I(v; u) \right) + \sum_{\substack{v \in V \\ \pi^{un}(v) = \emptyset}} I(v; \pi(v)) \quad \text{By Lemma 8} \\
&= \sum_{v \in V} I(v; \pi^{in}(v)) + \sum_{\substack{v \in V \\ \pi^{un}(v) \neq \emptyset}} \left( \varepsilon \cdot |\pi(v)| + \sum_{u \in \pi^{un}(v)} I(v; u) \right)
\end{aligned}$$

452 where the final equality is because  $\pi^{in}(v) = \pi(v)$  when  $\pi^{un}(v) = \emptyset$ . Since  $|\pi(v)| \leq d^*$  and  $|V| = n$ ,  
453 we get

$$\sum_{v \in V} I(v; \pi(v)) \leq nd^* \varepsilon + \sum_{v \in V} I(v; \pi^{in}(v)) + \sum_{\substack{v \in V \\ \pi^{in}(v) \neq \emptyset}} \sum_{u \in \pi^{un}(v)} I(v; u)$$

454 Putting together, we get

$$\begin{aligned}
& \sum_{v \in V} I(v; \pi(v)) - \sum_{v \in V} I(v; \hat{\pi}(v)) \\
&\leq \left( nd^* \varepsilon + \sum_{v \in V} I(v; \pi^{in}(v)) + \sum_{\substack{v \in V \\ \pi^{in}(v) \neq \emptyset}} \sum_{u \in \pi^{un}(v)} I(v; u) \right) \quad \text{From above} \\
&\quad - \left( \sum_{v \in V} I(v; \pi^{in}(v)) + \sum_{v \in A} I(v; a_v) - n\varepsilon \right) \\
&= n \cdot (d^* + 1) \cdot \varepsilon + \sum_{v \in V} \sum_{u \in \pi^{un}(v)} I(v; u) - \sum_{v \in A} I(v; a_v) \\
&= n \cdot (d^* + 1) \cdot \varepsilon
\end{aligned}$$

455 where the last equality is because the last two terms are two different ways to enumerate the edges of  
456  $H$ , e.g. see Fig. 3.

457 □

### 458 A.3 Skeleton assumption

459 **Lemma 12.** Under [Assumption 11](#), running the Chow-Liu algorithm on the  $m$ -sample empirical  
460 estimates  $\{\hat{I}(u; v)\}_{u, v \in V}$  recovers a ground truth skeleton with high probability when  $m \geq \Omega(\frac{\log n}{\varepsilon_P^2})$ .

461 *Proof.* Fix a graph  $G^*$ . Recall that the Chow-Liu algorithm can be thought of as running maximum  
462 spanning tree with the edge weights as the estimated mutual information between any pair of vertices.  
463 With  $m \geq \Omega(\log(n)/\varepsilon_P^2)$  samples and [Assumption 11](#), one can estimate  $\hat{I}(u; v)$  up to  $\varepsilon_P$ -closeness  
464 with high probability in  $n$ , i.e.  $|I(u; v) - \hat{I}(u; v)| \leq \varepsilon_P$  for any pair of vertices  $u, v \in V$ .

465 Now, consider two arbitrary vertices  $u$  and  $v$  that are *not* neighbors in  $G^*$ .

466 **Case 1 ( $u$  and  $v$  belong in the same connected component in  $G^*$ ):** Let  $P_{u,v} = z_0 - z_1 - \dots -$   
467  $z_k - z_{k+1}$  be the unique path between  $u = z_0$  and  $v = z_{k+1}$ , where  $k \geq 1$ . Then,

$$\hat{I}(u; v) - \varepsilon_P \leq I(u; v) \leq I(z_i, z_{i+1}) - 3 \cdot \varepsilon_P \leq \hat{I}(z_i, z_{i+1}) - 2 \cdot \varepsilon_P$$

468 for any  $i \in \{1, \dots, k\}$ . That is, the Chow-Liu algorithm will *not* add the edge  $u \sim v$  in the output  
469 tree.

470 **Case 2 ( $u$  and  $v$  belong in the different connected components in  $G^*$ ):** Since  $u$  and  $v$  belong in  
471 the different connected components in  $G^*$ , we have  $I(u; v) = 0$ . With  $m$  samples, for any two edge  
472  $a \sim b$  in  $G^*$ , we have

$$\hat{I}(u; v) \leq I(u; v) + \varepsilon_P = \varepsilon_P < 2 \cdot \varepsilon_P \leq I(a; b) - \varepsilon_P \leq \hat{I}(a; b)$$

473 That is, the Chow-Liu algorithm will always add edges crossing different components *after* all true  
474 edges have been considered.  $\square$

### 475 A.4 Lower bounds

476 We will use the following inequality in our proofs.

477 *Fact 19.* For  $x > 0$ , we have  $\log_2(1 + x) \geq \log_2(e) \cdot \left(x - \frac{x^2}{2}\right) = \log_2(e) \cdot x \cdot \left(1 - \frac{x}{2}\right)$ .

478 Recall the lower bound distributions from [Section 5](#), but we replace  $\sqrt{\varepsilon}$  with  $\alpha$  for notational  
479 convenience:

$$P_1 : \begin{cases} X \sim \text{Bern}(1/2) \\ Z = \begin{cases} X & \text{w.p. } 1/2 \\ \text{Bern}(1/2) & \text{w.p. } 1/2 \end{cases} \\ Y = \begin{cases} Z & \text{w.p. } \alpha \\ \text{Bern}(1/2) & \text{w.p. } 1 - \alpha \end{cases} \end{cases} \quad P_2 : \begin{cases} X \sim \text{Bern}(1/2) \\ Y \sim \text{Bern}(1/2) \\ Z = \begin{cases} X & \text{w.p. } 1/2 \\ Y & \text{w.p. } \alpha \\ \text{Bern}(1/2) & \text{w.p. } 1/2 - \alpha \end{cases} \end{cases}$$

480 By construction, we have

$$P_1(x, y, z) = \frac{1}{2} \cdot \left(\frac{1}{2} \cdot \frac{1}{2} + \frac{1}{2} \cdot \mathbb{1}_{x=z}\right) \cdot \left(\alpha \cdot \mathbb{1}_{y=z} + (1 - \alpha) \cdot \frac{1}{2}\right)$$

481 and

$$P_2(x, y, z) = \frac{1}{2} \cdot \frac{1}{2} \cdot \left(\frac{1}{2} \cdot \mathbb{1}_{x=z} + \alpha \cdot \mathbb{1}_{y=z} + \left(\frac{1}{2} - \alpha\right) \cdot \frac{1}{2}\right)$$

482 which corresponds to the probability tables given in [Table 1](#).

483 **Lemma 20.**  $d_H^2(P_1, P_2) \leq \alpha^2$

| $x$ | $y$ | $z$ | $P_1(x, y, z)$                    | $P_2(x, y, z)$                     |
|-----|-----|-----|-----------------------------------|------------------------------------|
| 0   | 0   | 0   | $\frac{3}{16} \cdot (1 + \alpha)$ | $\frac{1}{16} \cdot (3 + 2\alpha)$ |
| 0   | 0   | 1   | $\frac{1}{16} \cdot (1 - \alpha)$ | $\frac{1}{16} \cdot (1 - 2\alpha)$ |
| 0   | 1   | 0   | $\frac{3}{16} \cdot (1 - \alpha)$ | $\frac{1}{16} \cdot (3 - 2\alpha)$ |
| 0   | 1   | 1   | $\frac{1}{16} \cdot (1 + \alpha)$ | $\frac{1}{16} \cdot (1 + 2\alpha)$ |
| 1   | 0   | 0   | $\frac{1}{16} \cdot (1 + \alpha)$ | $\frac{1}{16} \cdot (1 + 2\alpha)$ |
| 1   | 0   | 1   | $\frac{3}{16} \cdot (1 - \alpha)$ | $\frac{1}{16} \cdot (3 - 2\alpha)$ |
| 1   | 1   | 0   | $\frac{1}{16} \cdot (1 - \alpha)$ | $\frac{1}{16} \cdot (1 - 2\alpha)$ |
| 1   | 1   | 1   | $\frac{3}{16} \cdot (1 + \alpha)$ | $\frac{1}{16} \cdot (3 + 2\alpha)$ |

Table 1: Explicit probability tables for our lower bound construction

484 *Proof.* From Table 1, we see that

$$\begin{aligned}
& \sum_{(x,y,z) \in \{0,1\}^3} \sqrt{P_1(x, y, z) \cdot P_2(x, y, z)} \\
&= \frac{1}{16} \cdot \left( \sqrt{3 \cdot (1 + \alpha) \cdot (3 + 2\alpha)} + \sqrt{(1 - \alpha) \cdot (1 - 2\alpha)} \right. \\
&\quad + \sqrt{3 \cdot (1 - \alpha) \cdot (3 - 2\alpha)} + \sqrt{(1 + \alpha) \cdot (1 + 2\alpha)} \\
&\quad + \sqrt{(1 + \alpha) \cdot (1 + 2\alpha)} + \sqrt{3 \cdot (1 - \alpha) \cdot (3 - 2\alpha)} \\
&\quad \left. + \sqrt{(1 - \alpha) \cdot (1 - 2\alpha)} + \sqrt{3 \cdot (1 + \alpha) \cdot (3 + 2\alpha)} \right) \\
&= \frac{1}{8} \cdot \left( \sqrt{3 \cdot (1 + \alpha) \cdot (3 + 2\alpha)} + \sqrt{(1 - \alpha) \cdot (1 - 2\alpha)} \right. \\
&\quad \left. + \sqrt{3 \cdot (1 - \alpha) \cdot (3 - 2\alpha)} + \sqrt{(1 + \alpha) \cdot (1 + 2\alpha)} \right)
\end{aligned}$$

485 Consider the Taylor expansion of each of the four terms at  $\alpha = 0$ :

$$\begin{aligned}
\sqrt{3 \cdot (1 + \alpha) \cdot (3 + 2\alpha)} &= 3 + \frac{5\alpha}{2} - \frac{\alpha^2}{24} + \frac{5\alpha^3}{144} - \dots \\
\sqrt{(1 - \alpha) \cdot (1 - 2\alpha)} &= 1 - \frac{3\alpha}{2} - \frac{\alpha^2}{8} - \frac{3\alpha^3}{16} - \dots \\
\sqrt{3 \cdot (1 - \alpha) \cdot (3 - 2\alpha)} &= 3 - \frac{5\alpha}{2} - \frac{\alpha^2}{24} - \frac{5\alpha^3}{144} - \dots \\
\sqrt{(1 + \alpha) \cdot (1 + 2\alpha)} &= 1 + \frac{3\alpha}{2} - \frac{\alpha^2}{8} + \frac{3\alpha^3}{16} - \dots
\end{aligned}$$

486 So,

$$\begin{aligned}
& \sum_{(x,y,z) \in \{0,1\}^3} \sqrt{P_1(x, y, z) \cdot P_2(x, y, z)} \\
&= \frac{1}{8} \cdot \left( \sqrt{3 \cdot (1 + \alpha) \cdot (3 + 2\alpha)} + \sqrt{(1 - \alpha) \cdot (1 - 2\alpha)} \right. \\
&\quad \left. + \sqrt{3 \cdot (1 - \alpha) \cdot (3 - 2\alpha)} + \sqrt{(1 + \alpha) \cdot (1 + 2\alpha)} \right) \\
&\geq \frac{1}{8} \cdot \left( 8 - \frac{\alpha^2}{3} - \mathcal{O}(\alpha^4) \right) \\
&\geq 1 - \frac{\alpha^2}{24} - \mathcal{O}(\alpha^4)
\end{aligned}$$

487 Hence,

$$d_H^2(P_1, P_2) = 1 - \sum_{(x,y,z) \in \{0,1\}^3} \sqrt{P_1(x,y,z) \cdot P_2(x,y,z)} \leq \frac{\alpha^2}{24} + \mathcal{O}(\alpha^4) \in \mathcal{O}(\alpha^2)$$

488

□

489 **Lemma 21.**  $d_{\text{KL}}(P_1 \parallel P_{1,G_1}) = 0$  and  $d_{\text{KL}}(P_1 \parallel P_{1,G_2}) \in \Omega(\alpha^2)$

490 *Proof.* We have  $d_{\text{KL}}(P_1 \parallel P_{1,G_1}) = 0$  by definition of  $P_1$ :  $Z$  depends on  $X$  and  $Y$  depends on  $Z$ .

491 Observe that

$$\begin{aligned} & d_{\text{KL}}(P_1 \parallel P_{1,G_2}) \\ &= I(X; Z) + I(X; Y) - I(Z; X, Y) \\ &= I(X; Z) + I(X; Y) - (I(Z; X) + I(Z; Y) + I(X; Y \mid Z) - I(X; Y)) \quad (\dagger) \\ &= I(X; Y) - I(X; Y \mid Z) \\ &= I(X; Y) \end{aligned}$$

Since  $I(X; Y \mid Z) = 0$  in  $P_1$

492 where  $(\dagger)$  is by applying **Lemma 17** with  $v = Z$ ,  $A = \{X\}$ ,  $B = \{Y\}$ .

493 We will now show that  $I(X; Y) \in \Omega(\alpha^2)$ .

| $x$ | $y$ | $P_1(x, y)$                      |
|-----|-----|----------------------------------|
| 0   | 0   | $\frac{1}{8} \cdot (2 + \alpha)$ |
| 0   | 1   | $\frac{1}{8} \cdot (2 - \alpha)$ |
| 1   | 0   | $\frac{1}{8} \cdot (2 - \alpha)$ |
| 1   | 1   | $\frac{1}{8} \cdot (2 + \alpha)$ |

Table 2: Probability table for  $P_1(x, y)$

494 From **Table 1**, one can verify that  $P_1(x = 0) = P_1(x = 1) = P_1(y = 0) = P_1(y = 1) = 1/2$ . So,

$$\begin{aligned} I(X; Y) &= \sum_{(x,y) \in \{0,1\}^2} P_1(x, y) \cdot \log \frac{P_1(x, y)}{P_1(x) \cdot P_1(y)} \\ &= \frac{1}{8} \cdot \left( (2 + \alpha) \cdot \log \left( \frac{(2 + \alpha)/8}{1/4} \right) + (2 - \alpha) \cdot \log \left( \frac{(2 - \alpha)/8}{1/4} \right) \right. \\ &\quad \left. + (2 + \alpha) \cdot \log \left( \frac{(2 + \alpha)/8}{1/4} \right) + (2 - \alpha) \cdot \log \left( \frac{(2 - \alpha)/8}{1/4} \right) \right) \quad \text{From Table 2} \\ &= \frac{1}{4} \cdot \left( (2 + \alpha) \cdot \log \left( 1 + \frac{\alpha}{2} \right) + (2 - \alpha) \cdot \log \left( 1 - \frac{\alpha}{2} \right) \right) \\ &\geq \frac{1}{4} \cdot \log_2(e) \cdot \frac{\alpha}{2} \cdot \left( (2 + \alpha) \cdot \left( 1 - \frac{\alpha}{4} \right) - (2 - \alpha) \cdot \left( 1 + \frac{\alpha}{4} \right) \right) \quad \text{By Fact 19} \\ &\geq \frac{1}{8} \cdot \log_2(e) \cdot \alpha \cdot \left( \left( 2 + \alpha - \frac{\alpha}{2} - \frac{\alpha^2}{4} \right) - \left( 2 - \alpha + \frac{\alpha}{2} - \frac{\alpha^2}{4} \right) \right) \\ &= \frac{1}{8} \cdot \log_2(e) \cdot \alpha^2 \\ &\in \Omega(\alpha^2) \end{aligned}$$

495

□

496 **Lemma 22.**  $d_{\text{KL}}(P_2 \parallel P_{2,G_2}) = 0$  and  $d_{\text{KL}}(P_2 \parallel P_{2,G_1}) \in \Omega(\alpha^2)$

497 *Proof.* We have  $d_{\text{KL}}(P_2 \parallel P_{2,G_2}) = 0$  by definition of  $P_2$ :  $Z$  depends on both  $X$  and  $Y$ .

498 Observe that

$$\begin{aligned}
& d_{\text{KL}}(P_2 \parallel P_{2,G_1}) \\
&= I(Z; X, Y) - I(X; Z) - I(Z; Y) \\
&= (I(Z; X) + I(Z; Y) + I(X; Y \mid Z) - I(X; Y)) - I(X; Z) - I(Z; Y) \quad (\dagger) \\
&= I(X; Y \mid Z) - I(X; Y) \\
&= I(X; Y \mid Z) \qquad \qquad \qquad \text{Since } I(X; Y) = 0 \text{ in } P_2
\end{aligned}$$

499 where  $(\dagger)$  is by applying [Lemma 17](#) with  $v = Z$ ,  $A = \{X\}$ ,  $B = \{Y\}$ .

500 We will now show that  $I(X; Y \mid Z) \in \Omega(\alpha^2)$ .

| $x$ | $y$ | $P_2(x, y \mid z = 0)$            | $P_2(x, y \mid z = 1)$            |
|-----|-----|-----------------------------------|-----------------------------------|
| 0   | 0   | $\frac{1}{8} \cdot (3 + 2\alpha)$ | $\frac{1}{8} \cdot (1 - 2\alpha)$ |
| 0   | 1   | $\frac{1}{8} \cdot (3 - 2\alpha)$ | $\frac{1}{8} \cdot (1 + 2\alpha)$ |
| 1   | 0   | $\frac{1}{8} \cdot (1 + 2\alpha)$ | $\frac{1}{8} \cdot (3 - 2\alpha)$ |
| 1   | 1   | $\frac{1}{8} \cdot (1 - 2\alpha)$ | $\frac{1}{8} \cdot (3 + 2\alpha)$ |

  

| $x$ | $P_2(x \mid z = 0)$ | $P_2(x \mid z = 1)$ |
|-----|---------------------|---------------------|
| 0   | $\frac{3}{4}$       | $\frac{1}{4}$       |
| 1   | $\frac{1}{4}$       | $\frac{3}{4}$       |

  

| $y$ | $P_2(y \mid z = 0)$  | $P_2(y \mid z = 1)$  |
|-----|----------------------|----------------------|
| 0   | $\frac{1+\alpha}{2}$ | $\frac{1-\alpha}{2}$ |
| 1   | $\frac{1-\alpha}{2}$ | $\frac{1+\alpha}{2}$ |

Table 3: Conditional probability tables for  $P_2$ .

501 By definition,

$$\begin{aligned}
I(X; Y \mid Z) &= \sum_{(x,y,z) \in \{0,1\}^3} P_2(x, y \mid z) \cdot \log \left( \frac{P_2(x, y \mid z)}{P_2(x \mid z) \cdot P_2(y \mid z)} \right) \\
&= I(X; Y \mid Z = 0) + I(X; Y \mid Z = 1)
\end{aligned}$$

502 From [Table 1](#) and [Table 3](#), one can verify that  $P_2(z = 0) = P_2(z = 1) = 1/2$  and  $I(X; Y \mid Z =$   
503  $0) = I(X; Y \mid Z = 1)$ . So, it suffices to show that  $I(X; Y \mid Z = 0) \in \Omega(\alpha^2)$ .

$$\begin{aligned}
& I(X; Y \mid Z = 0) \\
&= \sum_{(x,y) \in \{0,1\}^2} P_2(x, y \mid z = 0) \cdot \log \left( \frac{P_2(x, y \mid z = 0)}{P_2(x \mid z = 0) \cdot P_2(y \mid z = 0)} \right) \\
&= \frac{3+2\alpha}{8} \cdot \log \left( \frac{\frac{1}{8} \cdot (3+2\alpha)}{\frac{3}{4} \cdot \frac{1+\alpha}{2}} \right) + \frac{3-2\alpha}{8} \cdot \log \left( \frac{\frac{1}{8} \cdot (3-2\alpha)}{\frac{3}{4} \cdot \frac{1-\alpha}{2}} \right) \\
&\quad + \frac{1}{8} \cdot (1+2\alpha) \cdot \log \left( \frac{\frac{1}{8} \cdot (1+2\alpha)}{\frac{1}{4} \cdot \frac{1+\alpha}{2}} \right) + \frac{1}{8} \cdot (1-2\alpha) \cdot \log \left( \frac{\frac{1}{8} \cdot (1-2\alpha)}{\frac{1}{4} \cdot \frac{1-\alpha}{2}} \right) \\
&= \frac{3+2\alpha}{8} \cdot \log \left( \frac{3+2\alpha}{3+3\alpha} \right) + \frac{3-2\alpha}{8} \cdot \log \left( \frac{3-2\alpha}{3-3\alpha} \right) + \frac{1+2\alpha}{8} \cdot \log \left( \frac{1+2\alpha}{1+\alpha} \right) + \frac{1-2\alpha}{8} \cdot \log \left( \frac{1-2\alpha}{1-\alpha} \right) \\
&= \frac{3}{8} \cdot \log \left( \frac{3+2\alpha}{3+3\alpha} \cdot \frac{3-2\alpha}{3-3\alpha} \right) + \frac{1}{8} \cdot \log \left( \frac{1+2\alpha}{1+\alpha} \cdot \frac{1-2\alpha}{1-\alpha} \right) + \frac{\alpha}{4} \cdot \log \left( \frac{3+2\alpha}{3+3\alpha} \cdot \frac{3-3\alpha}{3-2\alpha} \cdot \frac{1+2\alpha}{1+\alpha} \cdot \frac{1-\alpha}{1-2\alpha} \right)
\end{aligned}$$

504 By Taylor series at  $\alpha = 0$ , one can verify that



505 • By Taylor series<sup>5</sup> of  $\frac{3+2\alpha}{3+3\alpha} \cdot \frac{3-2\alpha}{3-3\alpha} = 1 + \frac{5}{9}\alpha^2 + \frac{5}{9}\alpha^4 + \mathcal{O}(\alpha^6)$

506 • By Taylor series<sup>6</sup> of  $\frac{1+2\alpha}{1+\alpha} \cdot \frac{1-2\alpha}{1-\alpha} = 1 - 3\alpha^2 - 3\alpha^4 + \mathcal{O}(\alpha^6)$

507 • By Taylor series<sup>7</sup> of  $\frac{3+2\alpha}{3+3\alpha} \cdot \frac{3-3\alpha}{3-2\alpha} \cdot \frac{1+2\alpha}{1+\alpha} \cdot \frac{1-\alpha}{1-2\alpha}$   
 508  $= 1 + \frac{4}{3}\alpha + \frac{8}{9}\alpha^2 + \frac{124}{27}\alpha^3 + \frac{464}{81}\alpha^4 + \frac{3844}{243}\alpha^5 + \mathcal{O}(\alpha^6)$

509 Motivated by the Taylor series, for  $0 \leq \alpha \leq 1/2$ , one can verify that

510 •  $\frac{3+2\alpha}{3+3\alpha} \cdot \frac{3-2\alpha}{3-3\alpha} \geq 1 + \frac{5}{9}\alpha^2$

511 •  $\frac{1+2\alpha}{1+\alpha} \cdot \frac{1-2\alpha}{1-\alpha} \geq 1 - 3\alpha^2 - 4\alpha^4$

512 •  $\frac{3+2\alpha}{3+3\alpha} \cdot \frac{3-3\alpha}{3-2\alpha} \cdot \frac{1+2\alpha}{1+\alpha} \cdot \frac{1-\alpha}{1-2\alpha} \geq 1 + \frac{4}{3}\alpha$

513 Thus, using [Fact 19](#), we get

$$\begin{aligned} & I(X; Y \mid Z = 0) \\ &= \frac{3}{8} \cdot \log \left( \frac{3+2\alpha}{3+3\alpha} \cdot \frac{3-2\alpha}{3-3\alpha} \right) + \frac{1}{8} \cdot \log \left( \frac{1+2\alpha}{1+\alpha} \cdot \frac{1-2\alpha}{1-\alpha} \right) + \frac{\alpha}{4} \cdot \log \left( \frac{3+2\alpha}{3+3\alpha} \cdot \frac{3-3\alpha}{3-2\alpha} \cdot \frac{1+2\alpha}{1+\alpha} \cdot \frac{1-\alpha}{1-2\alpha} \right) \\ &\geq \frac{3}{8} \cdot \log \left( 1 + \frac{5}{9}\alpha^2 \right) + \frac{1}{8} \cdot \log (1 - 3\alpha^2 - 4\alpha^4) + \frac{\alpha}{4} \cdot \log \left( 1 + \frac{4}{3}\alpha \right) \\ &\geq \log_2(e) \cdot \left( \frac{3}{8} \cdot \left( \frac{5}{9}\alpha^2 - \left( \frac{5}{9}\alpha^2 \right)^2 \right) - \frac{1}{8} \cdot \left( 3\alpha^2 + 4\alpha^4 + (3\alpha^2 + 4\alpha^4)^2 \right) + \frac{\alpha}{4} \cdot \left( \frac{4}{3}\alpha - \left( \frac{4}{3}\alpha \right)^2 \right) \right) \\ &= \log_2(e) \cdot \left( \frac{\alpha^2}{6} - \mathcal{O}(\alpha^3) \right) \\ &\in \mathcal{O}(\alpha^2) \end{aligned}$$

514 □

515 **Lemma 13.** Let  $G_1$  be  $X \rightarrow Z \rightarrow Y$  and  $G_2$  be  $X \rightarrow Z \leftarrow Y$ , such that  $\text{skel}(G_1) = \text{skel}(G_2)$  is  
 516  $X - Z - Y$ . With respect to [Eq. \(3\)](#), we have the following:

517 1.  $d_H^2(P_1, P_2) \in \mathcal{O}(\varepsilon)$

518 2.  $d_{\text{KL}}(P_1 \parallel P_{1,G_1}) = 0$  and  $d_{\text{KL}}(P_1 \parallel P_{1,G_2}) \in \Omega(\varepsilon)$

519 3.  $d_{\text{KL}}(P_2 \parallel P_{2,G_2}) = 0$  and  $d_{\text{KL}}(P_2 \parallel P_{2,G_1}) \in \Omega(\varepsilon)$

520 *Proof.* Combine [Lemma 20](#), [Lemma 21](#), and [Lemma 22](#) with  $\alpha$  as  $\sqrt{\varepsilon}$ . □

<sup>5</sup>e.g. see <https://www.wolframalpha.com/input?i=taylor+series+of+%5Cfrac%7B3+%2B+2+%5Calpha%7D%7B3+%2B+3+%5Calpha%7D+%5Cdot+%5Cfrac%7B3+-+2+%5Calpha%7D%7B3+-+3+%5Calpha%7D+at+alpha+%3D+0>

<sup>6</sup>e.g. see <https://www.wolframalpha.com/input?i=taylor+series+of+%5Cfrac%7B1+%2B+2+%5Calpha%7D%7B1+%2B+%5Calpha%7D+%5Cdot+%5Cfrac%7B1+-+2+%5Calpha%7D%7B1+-+%5Calpha%7D+at+alpha+%3D+0>

<sup>7</sup>e.g. see <https://www.wolframalpha.com/input?i=taylor+series+of+%5Cfrac%7B3+%2B+2+%5Calpha%7D%7B3+%2B+3+%5Calpha%7D+%5Cdot+%5Cfrac%7B3+-+3+%5Calpha%7D%7B3+-+2+%5Calpha%7D+%5Cdot+%5Cfrac%7B1+%2B+2+%5Calpha%7D%7B1+%2B+%5Calpha%7D+%5Cdot+%5Cfrac%7B1+-+%5Calpha%7D%7B1+-+2+%5Calpha%7D+at+0>
